# Supplementary material for: MiR-23a modulates X-linked inhibitor of apoptosis-mediated autophagy in human luminal breast cancer cell lines
Source: PubMed Central journal article supplement (PMC5655233; doi:10.18632/oncotarget.21080), 2017-09-19
Supplement: oncotarget-08-80709-s001.pdf [file oncotarget-08-80709-s001.pdf]

## MiR-23a modulates X-linked inhibitor of apoptosis-mediated autophagy in human luminal breast cancer cell lines

### SUPPLEMENTARY MATERIALS

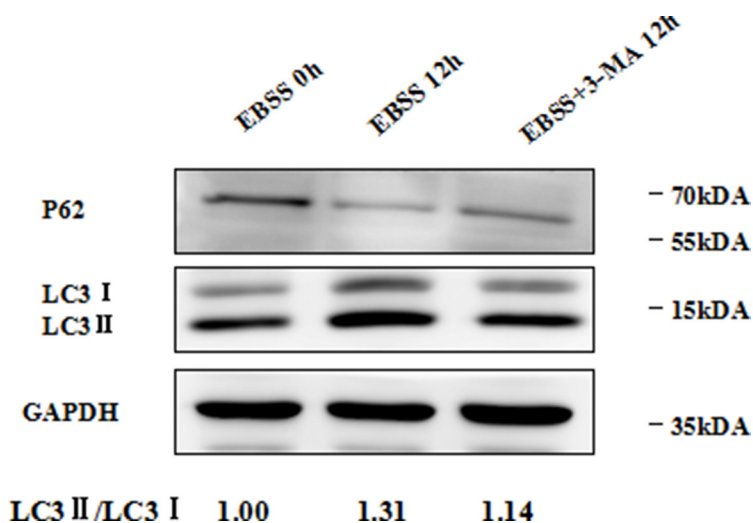

**Supplementary Figure 1: LC3-II is suggestive of induction of autophagy.** Western blot analysis of *SQSTM1/P62* and *LC3-II/I* expression after MCF-7 cells treated with EBSS and 3-MA.

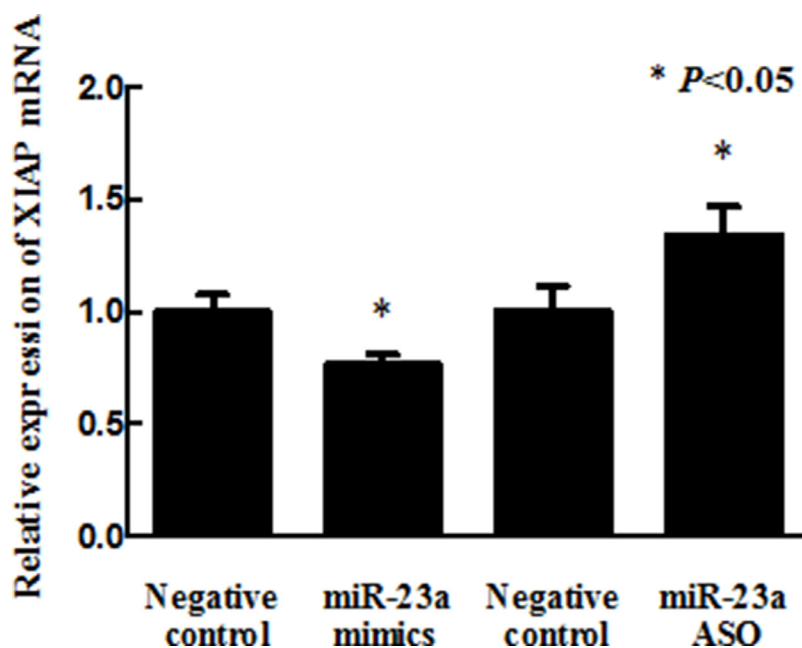

**Supplementary Figure 2: QRT-PCR analysis of XIAP expression.** T47D and MCF-7 cells were cultured and transiently transfected with *miR-23a* mimics and *miR-23a* ASO, respectively, and then performed RNA extraction and qRT-PCR, \*P > 0.05.

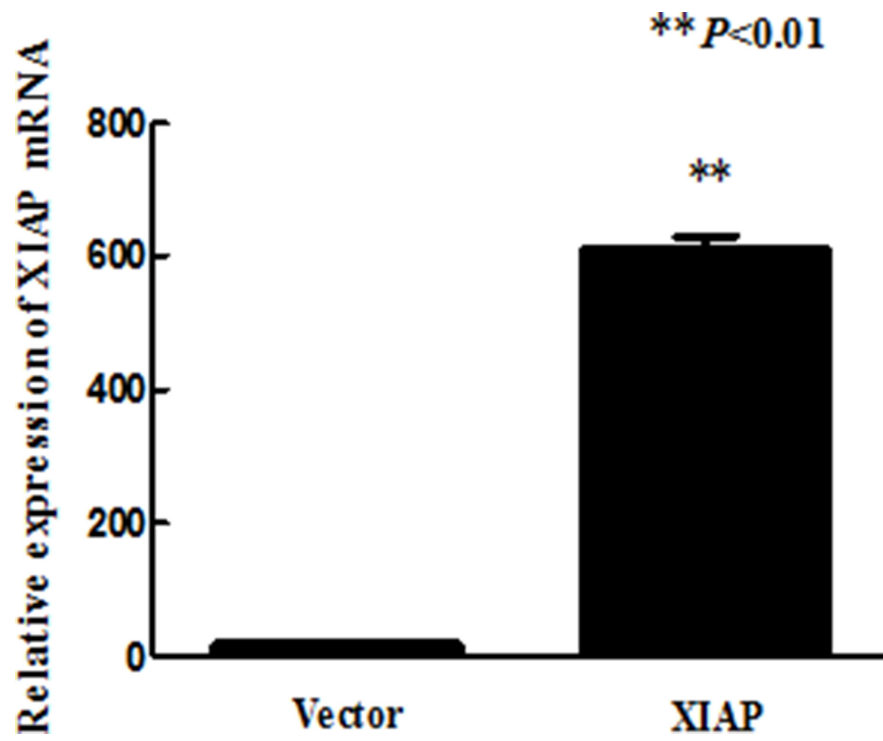

**Supplementary Figure 3: QRT-PCR analysis of *XIAP* expression.** T47D cells were transfected with *XIAP* expression plasmid, Vector was used as an internal control. The results are presented as the means  $\pm$  SD of values obtained in 3 independent experiments, **\*\* $P < 0.01$** .

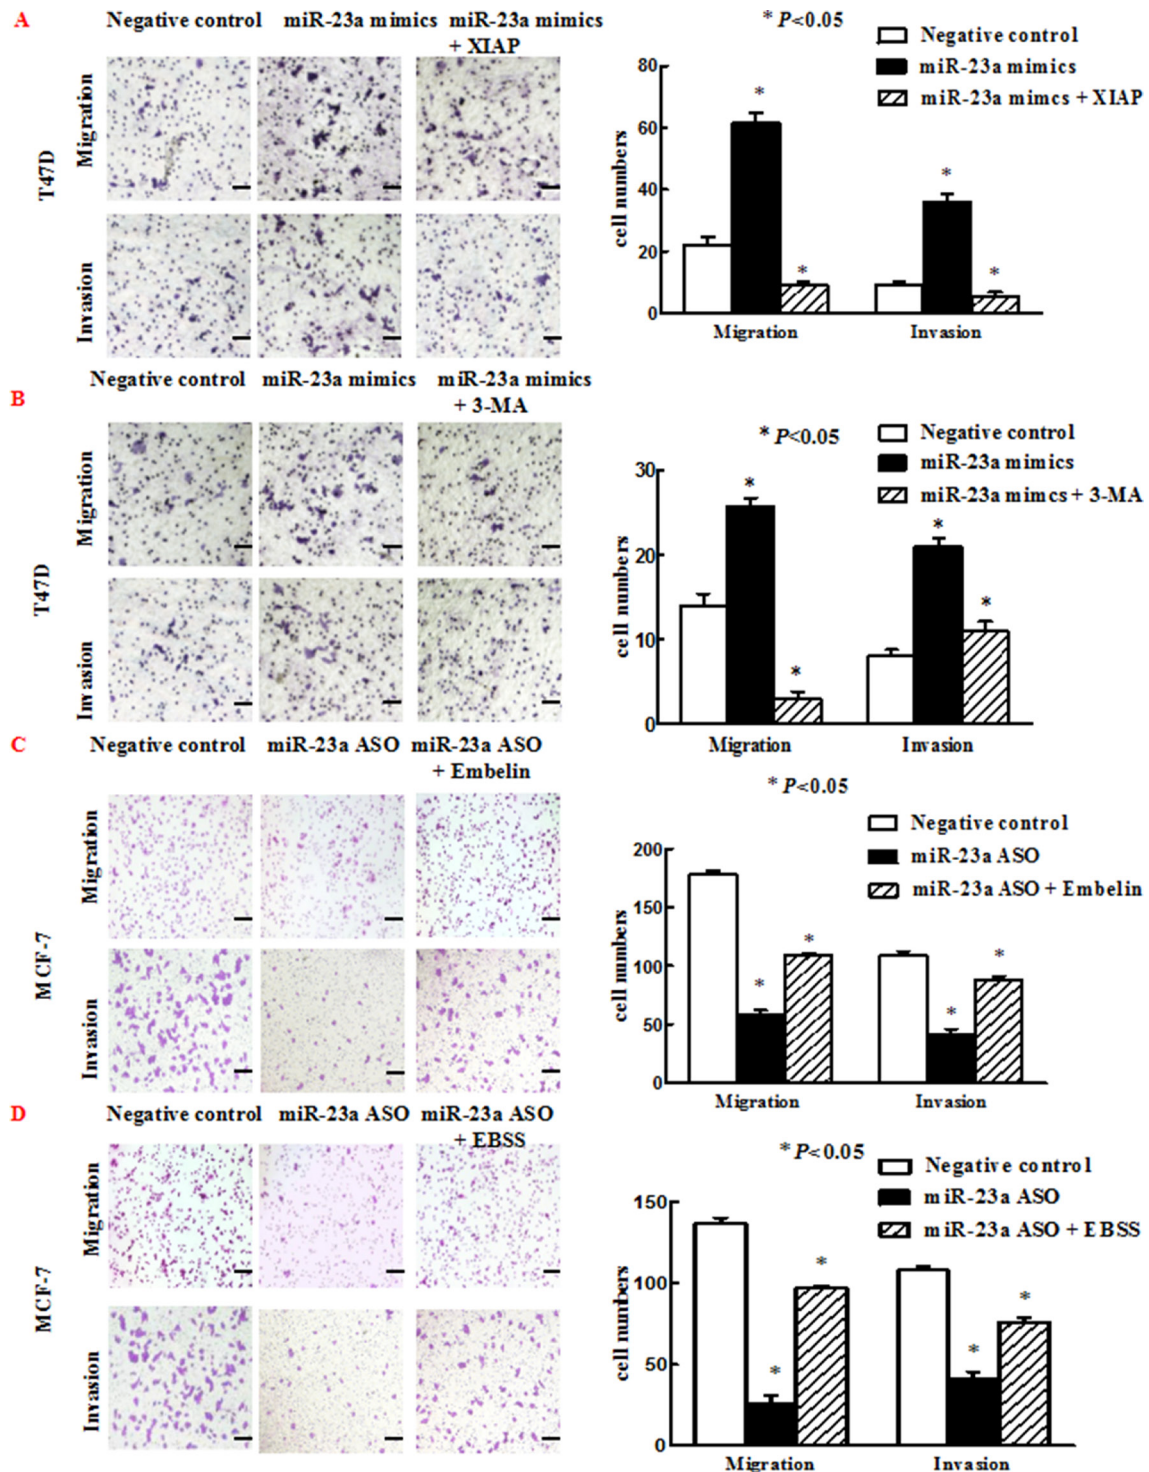

**Supplementary Figure 4: Transwell migration and invasion are shown.** (A) T47D cells were transfected with *miR-23a*, *miR-23a* mimics plus expression of *XIAP* or negative control for 48 hours and subjected to migration and invasion assays. (B) T47D cells were transfected with *miR-23a* or negative control and 48 hours later treated with 5 mM 3-MA for 24 h and subjected to migration and invasion assays. (C) MCF-7 cells were transfected with *miR-23a* ASO or negative control and treated with Embelin and subjected to migration and invasion assays. (D) MCF-7 cells were transfected with *miR-23a* ASO or negative control and treated with EBSS and subjected to migration and invasion assays. Representative photographs (left) and quantification (right) are shown. Original magnification  $\times 200$ .

**Supplementary Table 1: Sequences of miRNA oligonucleotides**

| miRNA            | Sense Strand (5'-3')         | Antisense Strand (5'-3')    |
|------------------|------------------------------|-----------------------------|
| miR-23a mimics   | 5'-AUCACAUUGCCAGGGAUUUCC-3'  | 5'-AAAUCCCUGGCAAUGUGAUUU-3' |
| Negative control | 5'- UUCUCCGAACGUGUCACGUTT-3' | 5'-ACGUGACACGUUCGUAGAATT-3' |
| miR-23a ASO      | 5' -GGAAAUCCCUGGCAAUGUGA- 3' |                             |
| ASO NC           | 5'-CAGUACUUUUGUGUAGUACAA-3'  |                             |

**Supplementary Table 2: Sequences of the oligonucleotide primers used for qRT- PCR are as follows**

| Name                   | Sequence 5'-3'                                                        |
|------------------------|-----------------------------------------------------------------------|
| GAPDH sense            | 5'- TGCACCACCAACTGCTTAGC-3'                                           |
| GAPDH antisense        | 5'-GGCATGGACTGTGGTCATGAG-3'                                           |
| ATG5 sense             | 5'-AGAATAGCCAGTACAGCA-3'                                              |
| ATG5 antisense         | 5'-ATGAACCGACGAATAAAC-3'                                              |
| ATG7 sense             | 5'-GTTGTTTGCTTCCGTGAC-3'                                              |
| ATG7 antisense         | 5'-TGCTCCTTTCTGGTTCT-3'                                               |
| ATG12 sense            | 5'-GCGAACACGAACCATCCA-3'                                              |
| ATG12 antisense        | 5'-CCACGCCTGAGACTTGCA-3'                                              |
| Beclin1 sense          | 5'-CAA GAT CCT GGA CCG TGT CA-3'                                      |
| Beclin1 antisense      | 5'-TGG CAC TTT CTG TGG ACA TCA-3'                                     |
| XIAP sense             | 5'- CAAGAAATCCATCCATGGCAG-3'                                          |
| XIAP antisense         | 5'- CAGTTAGCCCTCCTCCACAGTG-3'                                         |
| U6 RT primer           | 5'-GTCGTATCCAGTGCAGGGTCCGAGGTGCACTGGATACGACAAAATATGG-3'               |
| U6 forward primer      | 5'-GCTTCGGCAGCACATATACTAAAAT-3'                                       |
| U6 reverse primer      | 5'- CGCTTCA CGAATTTGCGTGTGCAT-3'                                      |
| miR-23a RT primer      | 5'-GTC GTA TCC AGT GCA GGGTCC GAGGTA TTC GCA CTGGAT ACG AC GGAAAT -3' |
| miR-23a forward primer | 5'-GCCGCATCACATTGCCAGGGA-3'                                           |
| miR-23a reverse primer | 5'-GTGCA GGGT CCG AGG T -3'                                           |
